# Supplementary material for: Downregulated pseudogene CTNNAP1 promote tumor growth in human cancer by downregulating its cognate gene CTNNA1 expression
Source: PubMed Central journal article supplement (PMC5342433; doi:10.18632/oncotarget.10833), 2016-07-25
Supplement: oncotarget-07-55518-s001.pdf [file oncotarget-07-55518-s001.pdf]

## Downregulated pseudogene *CTNNAP1* promote tumor growth in human cancer by downregulating its cognate gene *CTNNA1* expression

### SUPPLEMENTARY TABLE

Supplementary Table S1: The sequence of the predicted microRNA-141 binding sites in the region of *CTNNAP1* and *CTNNA1* 3'-UTR

| Position  | microRNA-141 binding site in <i>CTNNAP1</i>       |
|-----------|---------------------------------------------------|
| 616-639   | 5'-TTCAGCTGAAAGTTGTGGAAGATG-3'                    |
| 2072-2093 | 5'-TCTTACTTTGAGATGGAAGATT-3'                      |
| 2737-2766 | 5'-CTCAACCTTCCTGCTGTGTCATGGAAGATA-3'              |
| Position  | microRNA-141 binding site in <i>CTNNA1</i> 3'-UTR |
| 703-724   | 5'-ACUUCUAAUACUGCAGUGUUU-3'                       |
